# Supplementary material for: A real-world disproportionality analysis of mepolizumab based on the FDA adverse event reporting system
Source: Front Pharmacol. 2023 Dec 7;14:1280490. doi: 10.3389/fphar.2023.1280490 (PMC10748586; doi:10.3389/fphar.2023.1280490)
Supplement: Supplementary file 1 [file Table1.DOCX]

**Supplementary Table 1** Signal strength of mepolizumab associated reports at the preferred terms level

| SOC | Preferred terms  (PT) | Cases  (n) | ROR | 95% CI | |
| --- | --- | --- | --- | --- | --- |
| Low bound | Up  bound |
| Blood and lymphatic system disorders | Hypercoagulation | 3 | 3.15 | 1.01 | 9.775 |
| Hypereosinophilic syndrome | 8 | 24.6 | 12.2 | 49.66 |
| Lymphadenopathy | 40 | 1.64 | 1.21 | 2.244 |
| Spontaneous haemorrhage | 4 | 4.75 | 1.78 | 12.7 |
| Cardiac disorders | Angina pectoris | 55 | 3.06 | 2.34 | 3.985 |
| Arrhythmia | 62 | 2.01 | 1.56 | 2.576 |
| Arteriosclerosis coronary artery | 7 | 2.27 | 1.08 | 4.771 |
| Atrial conduction time prolongation | 3 | 164 | 47.5 | 566.5 |
| Cardiac aneurysm | 3 | 4.37 | 1.4 | 13.59 |
| Cardiac disorder | 124 | 2.11 | 1.77 | 2.518 |
| Cardiac failure | 71 | 1.26 | 1 | 1.597 |
| Cardiac failure congestive | 75 | 2.25 | 1.79 | 2.82 |
| Cardiac valve disease | 8 | 2.19 | 1.1 | 4.392 |
| Cardiomyopathy | 18 | 2.17 | 1.37 | 3.455 |
| Cardiovascular symptom | 3 | 7.99 | 2.56 | 24.9 |
| Eosinophilic myocarditis | 6 | 12.9 | 5.78 | 29.01 |
| Heart valve incompetence | 7 | 3.1 | 1.47 | 6.505 |
| Left ventricular dysfunction | 10 | 2.1 | 1.13 | 3.901 |
| Mitral valve stenosis | 3 | 7.17 | 2.3 | 22.35 |
| Myocardial infarction | 107 | 1.44 | 1.19 | 1.746 |
| Postural orthostatic tachycardia syndrome | 3 | 3.53 | 1.14 | 10.99 |
| Right atrial enlargement | 3 | 11 | 3.51 | 34.31 |
| Tachycardia | 74 | 1.29 | 1.03 | 1.622 |
| Congenital, familial and genetic disorders | Asplenia | 3 | 43.9 | 13.7 | 140.4 |
| Cystic fibrosis | 25 | 4.62 | 3.12 | 6.848 |
| Factor V Leiden mutation | 8 | 28.2 | 13.9 | 57 |
| Factor VIII deficiency | 3 | 21.6 | 6.86 | 67.91 |
| Haemoglobinopathy | 3 | 154 | 44.8 | 527.7 |
| Syringomyelia | 3 | 15.9 | 5.06 | 49.75 |
| Thalassaemia | 5 | 34.2 | 14 | 83.61 |
| Ear and labyrinth disorders | Deafness | 33 | 1.72 | 1.22 | 2.425 |
| Ear congestion | 5 | 2.47 | 1.03 | 5.939 |
| Ear discomfort | 17 | 2.24 | 1.39 | 3.599 |
| Ear disorder | 13 | 3.4 | 1.97 | 5.867 |
| Ear pain | 41 | 2.64 | 1.94 | 3.588 |
| Ear pruritus | 8 | 3.26 | 1.63 | 6.528 |
| Otorrhoea | 8 | 5.22 | 2.6 | 10.46 |
| Vertigo positional | 5 | 3.74 | 1.55 | 9.007 |
| Endocrine disorders | Addison's disease | 6 | 6.78 | 3.03 | 15.14 |
| Adrenal insufficiency | 64 | 6.7 | 5.23 | 8.567 |
| Hyperthyroidism | 19 | 1.69 | 1.07 | 2.645 |
| Hypothalamic pituitary adrenal axis suppression | 3 | 12.6 | 4.01 | 39.26 |
| Eye disorders | Cataract | 181 | 4.04 | 3.49 | 4.68 |
| Conjunctival haemorrhage | 7 | 2.69 | 1.28 | 5.65 |
| Conjunctivitis allergic | 6 | 5.15 | 2.31 | 11.5 |
| Dacryostenosis acquired | 3 | 3.35 | 1.08 | 10.42 |
| Eye haemorrhage | 23 | 2.39 | 1.59 | 3.599 |
| Eye pruritus | 34 | 1.52 | 1.08 | 2.128 |
| Eye ulcer | 3 | 5.44 | 1.75 | 16.94 |
| Glaucoma | 38 | 2.57 | 1.87 | 3.531 |
| Ocular discomfort | 15 | 1.83 | 1.1 | 3.038 |
| Optic nerve compression | 3 | 21.6 | 6.86 | 67.91 |
| Retinal artery occlusion | 7 | 4.29 | 2.04 | 9.019 |
| Vitreous haemorrhage | 6 | 3.3 | 1.48 | 7.349 |
| Gastrointestinal disorders | Abdominal rigidity | 6 | 3 | 1.35 | 6.693 |
| Acute abdomen | 3 | 3.32 | 1.07 | 10.33 |
| Cheilitis | 7 | 2.37 | 1.13 | 4.974 |
| Dental discomfort | 6 | 10.2 | 4.56 | 22.84 |
| Intestinal mass | 5 | 4.75 | 1.97 | 11.43 |
| Lip discolouration | 6 | 6.67 | 2.99 | 14.89 |
| Lip pruritus | 3 | 4.39 | 1.41 | 13.66 |
| Mouth swelling | 11 | 2.12 | 1.17 | 3.828 |
| Odynophagia | 11 | 2.82 | 1.56 | 5.104 |
| Oesophageal compression | 3 | 60 | 18.6 | 193.8 |
| Oesophageal discomfort | 3 | 6.89 | 2.21 | 21.47 |
| Oesophageal obstruction | 3 | 4.81 | 1.55 | 14.98 |
| Oesophageal rupture | 5 | 9.09 | 3.77 | 21.95 |
| Oesophageal spasm | 4 | 3.43 | 1.28 | 9.161 |
| Oral mucosal discolouration | 3 | 6.24 | 2 | 19.44 |
| Pancreatitis relapsing | 5 | 9.98 | 4.13 | 24.1 |
| Paraesthesia oral | 22 | 2.39 | 1.58 | 3.64 |
| Salivary gland enlargement | 3 | 8.48 | 2.72 | 26.46 |
| Stomach mass | 3 | 4.1 | 1.32 | 12.75 |
| Swollen tongue | 41 | 2.22 | 1.63 | 3.014 |
| Teeth brittle | 7 | 6.7 | 3.18 | 14.1 |
| Tongue disorder | 13 | 2.83 | 1.64 | 4.88 |
| Tongue pruritus | 4 | 7.04 | 2.63 | 18.84 |
| General disorders and administration site conditions | Administration site bruise | 4 | 12 | 4.48 | 32.25 |
| Adverse drug reaction | 93 | 1.42 | 1.16 | 1.747 |
| Application site joint movement impairment | 3 | 2460 | 256 | 23650 |
| Asthenia | 348 | 1.29 | 1.16 | 1.433 |
| Chest discomfort | 395 | 5.68 | 5.14 | 6.278 |
| Chest pain | 255 | 2.22 | 1.96 | 2.51 |
| Chills | 131 | 1.61 | 1.35 | 1.91 |
| Condition aggravated | 551 | 2.24 | 2.06 | 2.438 |
| Crepitations | 12 | 4.66 | 2.64 | 8.219 |
| Crying | 33 | 1.47 | 1.04 | 2.067 |
| Discharge | 4 | 3.06 | 1.15 | 8.168 |
| Discomfort | 66 | 1.38 | 1.08 | 1.752 |
| Disease recurrence | 79 | 2.51 | 2.01 | 3.126 |
| Disease susceptibility | 4 | 12.6 | 4.68 | 33.74 |
| Exercise tolerance decreased | 19 | 4.24 | 2.7 | 6.66 |
| Facial discomfort | 8 | 25.4 | 12.6 | 51.41 |
| Fat tissue increased | 5 | 4.52 | 1.87 | 10.88 |
| Fatigue | 1026 | 1.69 | 1.58 | 1.797 |
| Feeling hot | 58 | 1.43 | 1.1 | 1.848 |
| Gait inability | 67 | 2.09 | 1.64 | 2.658 |
| Ill-defined disorder | 148 | 4.3 | 3.65 | 5.055 |
| Illness | 146 | 2.44 | 2.07 | 2.871 |
| Influenza like illness | 115 | 2.08 | 1.73 | 2.503 |
| Injection site discomfort | 22 | 2.89 | 1.9 | 4.395 |
| Injection site haematoma | 8 | 3.18 | 1.59 | 6.372 |
| Injection site pain | 263 | 1.49 | 1.32 | 1.68 |
| Injection site paraesthesia | 6 | 6.12 | 2.74 | 13.67 |
| Injection site urticaria | 28 | 2.07 | 1.43 | 2.997 |
| Malaise | 890 | 2.58 | 2.41 | 2.757 |
| Mucosal discolouration | 18 | 32.9 | 20.5 | 52.73 |
| Mucosal disorder | 3 | 3.66 | 1.18 | 11.38 |
| Multimorbidity | 4 | 5.82 | 2.17 | 15.55 |
| Nonspecific reaction | 13 | 4.33 | 2.51 | 7.464 |
| Obstruction | 8 | 2.57 | 1.28 | 5.151 |
| Oedema peripheral | 89 | 1.36 | 1.1 | 1.675 |
| Pain | 598 | 1.15 | 1.06 | 1.251 |
| Peripheral swelling | 190 | 1.23 | 1.06 | 1.417 |
| Polyp | 18 | 2.97 | 1.87 | 4.726 |
| Puncture site pain | 4 | 23.9 | 8.86 | 64.71 |
| Pyrexia | 520 | 2.09 | 1.92 | 2.287 |
| Secretion discharge | 133 | 12 | 10.1 | 14.31 |
| Sense of oppression | 7 | 7.07 | 3.36 | 14.88 |
| Swelling face | 81 | 1.93 | 1.55 | 2.403 |
| Symptom recurrence | 20 | 5.77 | 3.72 | 8.96 |
| Therapeutic product effect incomplete | 670 | 9.83 | 9.09 | 10.63 |
| Therapeutic product ineffective | 6 | 2.45 | 1.1 | 5.461 |
| Therapeutic response shortened | 36 | 1.62 | 1.17 | 2.249 |
| Therapeutic response unexpected | 91 | 2.37 | 1.93 | 2.909 |
| Thirst decreased | 4 | 9.4 | 3.51 | 25.19 |
| Vaccination failure | 7 | 5.43 | 2.58 | 11.41 |
| Hepatobiliary disorders | Bile duct stone | 7 | 3.02 | 1.44 | 6.354 |
| Cholangitis acute | 3 | 4.84 | 1.56 | 15.07 |
| Cholelithiasis | 32 | 1.63 | 1.15 | 2.307 |
| Hepatic mass | 5 | 3.05 | 1.27 | 7.331 |
| Hepatosplenomegaly | 4 | 2.68 | 1 | 7.146 |
| Jaundice cholestatic | 5 | 2.49 | 1.03 | 5.989 |
| Immune system disorders | Allergy to arthropod sting | 4 | 13.1 | 4.89 | 35.24 |
| Allergy to plants | 3 | 7.74 | 2.48 | 24.12 |
| Anaphylactic reaction | 85 | 2.46 | 1.98 | 3.042 |
| Anaphylactoid reaction | 8 | 4.24 | 2.12 | 8.498 |
| Eosinophilic granulomatosis with polyangiitis | 98 | 68.6 | 55.8 | 84.39 |
| Food allergy | 16 | 3.12 | 1.91 | 5.097 |
| Hypersensitivity | 210 | 1.52 | 1.33 | 1.742 |
| Immune system disorder | 31 | 2.86 | 2.01 | 4.074 |
| Immunosuppression | 24 | 3.77 | 2.52 | 5.626 |
| Mite allergy | 6 | 9.55 | 4.27 | 21.37 |
| Multiple allergies | 62 | 10.5 | 8.18 | 13.51 |
| Perfume sensitivity | 4 | 5.21 | 1.95 | 13.94 |
| Sarcoidosis | 12 | 3.46 | 1.96 | 6.093 |
| Seasonal allergy | 26 | 2.05 | 1.39 | 3.013 |
| Serum sickness | 5 | 3.52 | 1.46 | 8.473 |
| Infections and infestations | Acute sinusitis | 4 | 3.16 | 1.18 | 8.436 |
| Appendicitis | 12 | 1.8 | 1.02 | 3.172 |
| Arthritis infective | 27 | 6.94 | 4.75 | 10.15 |
| Aspergillus infection | 26 | 4.31 | 2.93 | 6.333 |
| Atypical pneumonia | 8 | 3.24 | 1.62 | 6.486 |
| Bacterial abdominal infection | 4 | 38.6 | 14.2 | 105.2 |
| Bacterial infection | 38 | 2.95 | 2.14 | 4.052 |
| Bronchitis | 242 | 3.88 | 3.42 | 4.412 |
| Bronchopulmonary aspergillosis | 16 | 2.76 | 1.69 | 4.508 |
| Bronchopulmonary aspergillosis allergic | 15 | 16.8 | 10.1 | 27.97 |
| Cellulitis | 111 | 2.84 | 2.36 | 3.428 |
| Cellulitis orbital | 7 | 19.3 | 9.13 | 40.91 |
| Chikungunya virus infection | 5 | 9.17 | 3.8 | 22.15 |
| Chronic sinusitis | 33 | 10.2 | 7.23 | 14.38 |
| Coronavirus infection | 75 | 11.5 | 9.15 | 14.46 |
| COVID-19 | 310 | 2.16 | 1.93 | 2.418 |
| COVID-19 pneumonia | 25 | 2.25 | 1.52 | 3.331 |
| Cystitis | 49 | 1.81 | 1.37 | 2.396 |
| Dengue fever | 10 | 6.53 | 3.5 | 12.17 |
| Diverticulitis | 67 | 2.78 | 2.19 | 3.538 |
| Ear infection | 42 | 1.9 | 1.4 | 2.573 |
| Erysipelas | 9 | 2.13 | 1.11 | 4.101 |
| Fungal oesophagitis | 5 | 10 | 4.14 | 24.16 |
| Fungal pharyngitis | 6 | 20.9 | 9.31 | 47.09 |
| Gastric infection | 13 | 4.06 | 2.35 | 6.995 |
| Gingival abscess | 3 | 5.24 | 1.69 | 16.32 |
| Gingivitis | 8 | 2.05 | 1.02 | 4.106 |
| Haemophilus infection | 5 | 7.54 | 3.12 | 18.18 |
| Helminthic infection | 3 | 14.7 | 4.7 | 46.14 |
| Herpes ophthalmic | 4 | 3.85 | 1.44 | 10.29 |
| Herpes zoster | 172 | 3.55 | 3.05 | 4.128 |
| Infected cyst | 6 | 6.06 | 2.71 | 13.53 |
| Infected skin ulcer | 6 | 4.07 | 1.82 | 9.078 |
| Infection | 248 | 2.26 | 2 | 2.569 |
| Influenza | 347 | 3.72 | 3.35 | 4.144 |
| Kidney infection | 48 | 2.86 | 2.15 | 3.798 |
| Labyrinthitis | 5 | 2.58 | 1.07 | 6.212 |
| Laryngitis | 15 | 1.87 | 1.13 | 3.107 |
| Latent tuberculosis | 13 | 7.31 | 4.23 | 12.62 |
| Localised infection | 42 | 2.04 | 1.51 | 2.768 |
| Lower respiratory tract infection | 184 | 4.4 | 3.8 | 5.089 |
| Lower respiratory tract infection bacterial | 8 | 16 | 7.93 | 32.15 |
| Lower respiratory tract infection viral | 5 | 10.4 | 4.3 | 25.08 |
| Lung abscess | 11 | 7.37 | 4.07 | 13.35 |
| Lung infection | 177 | 12.2 | 10.5 | 14.16 |
| Lyme disease | 7 | 2.55 | 1.21 | 5.359 |
| Mastitis | 5 | 2.87 | 1.19 | 6.905 |
| Mycobacterial infection | 6 | 4.18 | 1.87 | 9.326 |
| Mycotic endophthalmitis | 4 | 36.9 | 13.5 | 100.4 |
| Nasopharyngitis | 437 | 2.82 | 2.56 | 3.102 |
| Oesophageal candidiasis | 11 | 3.98 | 2.2 | 7.205 |
| Ophthalmic herpes simplex | 4 | 8.52 | 3.18 | 22.82 |
| Ophthalmic herpes zoster | 8 | 4.78 | 2.39 | 9.584 |
| Oral infection | 7 | 2.66 | 1.27 | 5.593 |
| Parainfluenzae virus infection | 4 | 2.93 | 1.1 | 7.817 |
| Parotitis | 3 | 4.48 | 1.44 | 13.94 |
| Pharyngitis | 24 | 2.14 | 1.43 | 3.198 |
| Pneumonia | 1630 | 7.47 | 7.1 | 7.873 |
| Pneumonia bacterial | 29 | 4.32 | 3 | 6.221 |
| Pneumonia fungal | 7 | 2.68 | 1.28 | 5.627 |
| Pneumonia pseudomonal | 10 | 7.92 | 4.25 | 14.76 |
| Pneumonia respiratory syncytial viral | 3 | 5.79 | 1.86 | 18.02 |
| Pneumonia viral | 10 | 3.75 | 2.01 | 6.972 |
| Poliomyelitis | 3 | 50.2 | 15.6 | 161.1 |
| Pseudomonas infection | 24 | 4.26 | 2.85 | 6.363 |
| Psoas abscess | 3 | 7.28 | 2.34 | 22.68 |
| Pulmonary mycosis | 8 | 10.9 | 5.41 | 21.83 |
| Pulpitis dental | 4 | 4.49 | 1.68 | 12.01 |
| Pyelonephritis | 16 | 2.39 | 1.46 | 3.897 |
| Pyelonephritis acute | 5 | 3.33 | 1.38 | 8.017 |
| Respiratory tract infection | 143 | 6.83 | 5.78 | 8.053 |
| Respiratory tract infection fungal | 5 | 11.3 | 4.66 | 27.23 |
| Rhinitis | 76 | 11.1 | 8.82 | 13.89 |
| Sialoadenitis | 10 | 9.44 | 5.06 | 17.61 |
| Sinusitis | 291 | 3.47 | 3.09 | 3.898 |
| Sinusitis bacterial | 8 | 9.71 | 4.83 | 19.49 |
| Sinusitis fungal | 4 | 5.69 | 2.13 | 15.23 |
| Skin infection | 16 | 1.76 | 1.08 | 2.883 |
| Sputum purulent | 30 | 53.6 | 37 | 77.55 |
| Staphylococcal infection | 33 | 1.53 | 1.09 | 2.16 |
| Suspected COVID-19 | 37 | 8.57 | 6.2 | 11.86 |
| Upper respiratory tract infection | 85 | 2.3 | 1.86 | 2.848 |
| Urinary tract infection | 179 | 1.32 | 1.14 | 1.533 |
| Varicella | 6 | 3.58 | 1.61 | 7.992 |
| Viral disease carrier | 3 | 154 | 44.8 | 527.7 |
| Viral infection | 88 | 3.6 | 2.92 | 4.438 |
| Viral upper respiratory tract infection | 20 | 3.27 | 2.11 | 5.076 |
| Wound infection | 35 | 4.66 | 3.34 | 6.504 |
| Zika virus infection | 3 | 27 | 8.56 | 85.39 |
| Injury, poisoning and procedural complications | Accident | 16 | 1.75 | 1.07 | 2.853 |
| Accident at home | 3 | 7.3 | 2.34 | 22.75 |
| Accidental exposure to product | 228 | 3.57 | 3.13 | 4.065 |
| Accidental underdose | 17 | 2.05 | 1.27 | 3.295 |
| Anaesthetic complication neurological | 4 | 11.3 | 4.22 | 30.34 |
| Animal scratch | 5 | 6.11 | 2.53 | 14.73 |
| Bone fragmentation | 6 | 21.8 | 9.68 | 48.99 |
| Breast injury | 5 | 29.9 | 12.3 | 73.07 |
| Chest injury | 18 | 8.77 | 5.51 | 13.96 |
| Circumstance or information capable of leading to medication error | 45 | 2.17 | 1.62 | 2.905 |
| Contusion | 104 | 1.39 | 1.15 | 1.685 |
| Drug exposure before pregnancy | 3 | 7.76 | 2.49 | 24.19 |
| Exposure to allergen | 3 | 14.3 | 4.57 | 44.79 |
| Exposure to SARS-CoV-2 | 11 | 5.24 | 2.9 | 9.488 |
| Exposure via skin contact | 255 | 84 | 73.8 | 95.65 |
| Facial bones fracture | 10 | 3.05 | 1.64 | 5.679 |
| Fall | 385 | 1.55 | 1.4 | 1.712 |
| Forearm fracture | 3 | 5.83 | 1.87 | 18.15 |
| Foreign body in gastrointestinal tract | 3 | 8.01 | 2.57 | 24.98 |
| Foreign body in skin or subcutaneous tissue | 3 | 68.3 | 21 | 221.9 |
| Frostbite | 3 | 14 | 4.46 | 43.76 |
| Hip fracture | 37 | 1.61 | 1.17 | 2.228 |
| Immunisation reaction | 3 | 5.88 | 1.89 | 18.32 |
| Inappropriate schedule of product administration | 804 | 5.82 | 5.42 | 6.251 |
| Incision site discharge | 3 | 17.8 | 5.68 | 55.96 |
| Incorrect product administration duration | 50 | 2.72 | 2.06 | 3.594 |
| Injection related reaction | 13 | 11.3 | 6.54 | 19.56 |
| Joint dislocation | 14 | 1.75 | 1.03 | 2.952 |
| Joint injury | 29 | 1.68 | 1.17 | 2.424 |
| Ligament injury | 3 | 3.72 | 1.2 | 11.55 |
| Ligament sprain | 17 | 1.84 | 1.14 | 2.957 |
| Limb injury | 86 | 3.57 | 2.89 | 4.421 |
| Lower limb fracture | 33 | 2.43 | 1.73 | 3.422 |
| Lumbar vertebral fracture | 13 | 3.87 | 2.25 | 6.682 |
| Muscle rupture | 13 | 4.53 | 2.62 | 7.813 |
| Patella fracture | 6 | 3.55 | 1.59 | 7.917 |
| Procedural complication | 12 | 3.49 | 1.98 | 6.149 |
| Product administration interrupted | 10 | 2.55 | 1.37 | 4.739 |
| Product dispensing issue | 4 | 2.86 | 1.07 | 7.646 |
| Product dose omission | 379 | 3.76 | 3.39 | 4.163 |
| Product dose omission issue | 886 | 5.24 | 4.89 | 5.609 |
| Product preparation issue | 12 | 2.93 | 1.66 | 5.16 |
| Radius fracture | 7 | 4.44 | 2.11 | 9.341 |
| Rib fracture | 62 | 3.89 | 3.03 | 4.994 |
| Road traffic accident | 49 | 1.79 | 1.35 | 2.37 |
| Sciatic nerve injury | 3 | 4.2 | 1.35 | 13.05 |
| Scratch | 16 | 2.22 | 1.36 | 3.628 |
| Skin injury | 8 | 2.96 | 1.48 | 5.937 |
| Skin laceration | 22 | 2.57 | 1.69 | 3.911 |
| Skin wound | 9 | 7.27 | 3.77 | 14.01 |
| Spinal column injury | 5 | 2.49 | 1.03 | 5.982 |
| Spinal cord injury | 4 | 2.85 | 1.07 | 7.613 |
| Spinal fracture | 31 | 2.04 | 1.43 | 2.9 |
| Surgical procedure repeated | 3 | 25.1 | 7.96 | 79.19 |
| Thoracic vertebral fracture | 6 | 2.74 | 1.23 | 6.104 |
| Traumatic fracture | 3 | 5.77 | 1.85 | 17.98 |
| Traumatic lung injury | 12 | 7.75 | 4.39 | 13.68 |
| Traumatic shock | 4 | 50.5 | 18.4 | 138.5 |
| Underdose | 173 | 2.75 | 2.36 | 3.191 |
| Upper limb fracture | 25 | 1.51 | 1.02 | 2.231 |
| Uterine injury | 6 | 70.3 | 30.5 | 161.8 |
| Vaccination complication | 7 | 6.38 | 3.03 | 13.42 |
| Wrist fracture | 18 | 1.98 | 1.24 | 3.138 |
| Wrong schedule | 3 | 3.18 | 1.02 | 9.876 |
| Wrong technique in device usage process | 248 | 7.05 | 6.22 | 8.001 |
| Investigations | Alanine aminotransferase abnormal | 5 | 2.66 | 1.11 | 6.41 |
| Antineutrophil cytoplasmic antibody increased | 3 | 24.4 | 7.72 | 76.8 |
| Antineutrophil cytoplasmic antibody positive | 4 | 9.79 | 3.65 | 26.24 |
| Auscultation | 3 | 145 | 42.4 | 493.8 |
| Biopsy bone marrow | 7 | 22.5 | 10.6 | 47.72 |
| Biopsy endometrium abnormal | 4 | 1640 | 300 | 8955 |
| Biopsy lung | 4 | 12.6 | 4.7 | 33.87 |
| Biopsy tongue | 3 | 129 | 38.3 | 437.6 |
| Blood alkaline phosphatase abnormal | 3 | 5.09 | 1.64 | 15.85 |
| Blood cholesterol abnormal | 9 | 2.77 | 1.44 | 5.33 |
| Blood count abnormal | 169 | 8.04 | 6.9 | 9.365 |
| Blood electrolytes abnormal | 3 | 3.92 | 1.26 | 12.18 |
| Blood gases | 3 | 273 | 74 | 1010 |
| Blood immunoglobulin E decreased | 7 | 48.2 | 22.5 | 103.4 |
| Blood immunoglobulin E increased | 31 | 13.5 | 9.49 | 19.31 |
| Blood pressure abnormal | 25 | 1.58 | 1.07 | 2.336 |
| Blood pressure increased | 271 | 2.09 | 1.85 | 2.357 |
| Blood test abnormal | 31 | 2.59 | 1.82 | 3.69 |
| Blood urine | 5 | 10.2 | 4.22 | 24.64 |
| Body temperature abnormal | 9 | 4.91 | 2.55 | 9.46 |
| Breath sounds | 4 | 26.5 | 9.77 | 71.6 |
| Breath sounds abnormal | 48 | 11.2 | 8.45 | 14.94 |
| Breath sounds absent | 3 | 39 | 12.3 | 124.3 |
| Carbon dioxide increased | 4 | 4.09 | 1.53 | 10.92 |
| Cardiac murmur | 14 | 2.83 | 1.68 | 4.788 |
| Cardiac output decreased | 3 | 5.49 | 1.76 | 17.09 |
| Chest X-ray abnormal | 14 | 7.32 | 4.32 | 12.39 |
| Colonoscopy | 6 | 3.65 | 1.64 | 8.147 |
| Computerised tomogram abnormal | 6 | 5.06 | 2.27 | 11.3 |
| Coronavirus test positive | 55 | 45.5 | 34.7 | 59.72 |
| Emergency care examination | 4 | 10.1 | 3.78 | 27.14 |
| Enzyme level increased | 5 | 6.54 | 2.71 | 15.77 |
| Eosinophil count abnormal | 41 | 58 | 42.3 | 79.68 |
| Eosinophil count decreased | 31 | 22.7 | 15.9 | 32.48 |
| Eosinophil count increased | 64 | 9.61 | 7.51 | 12.3 |
| FEV1/FVC ratio abnormal | 3 | 76.9 | 23.5 | 251.1 |
| FEV1/FVC ratio decreased | 3 | 23 | 7.3 | 72.42 |
| Forced expiratory volume abnormal | 7 | 46.3 | 21.6 | 99.16 |
| Full blood count abnormal | 52 | 6.43 | 4.89 | 8.451 |
| Heart rate increased | 140 | 1.95 | 1.65 | 2.298 |
| Heart rate irregular | 30 | 1.57 | 1.1 | 2.254 |
| Heart sounds | 6 | 45.1 | 19.8 | 102.7 |
| Heart sounds abnormal | 3 | 6.61 | 2.12 | 20.6 |
| Immunoglobulins increased | 3 | 9.92 | 3.18 | 30.97 |
| Interleukin level increased | 3 | 10.3 | 3.31 | 32.28 |
| Monocyte count increased | 9 | 2.75 | 1.43 | 5.286 |
| Muscle strength abnormal | 3 | 10.5 | 3.35 | 32.69 |
| Mycobacterium test positive | 4 | 27.3 | 10.1 | 74.03 |
| Nerve conduction studies | 3 | 820 | 165 | 4063 |
| Oxygen saturation | 5 | 19.7 | 8.12 | 47.87 |
| Oxygen saturation abnormal | 38 | 13.8 | 10 | 19.09 |
| Oxygen saturation decreased | 182 | 4.13 | 3.57 | 4.788 |
| Peak expiratory flow rate abnormal | 4 | 63.1 | 22.8 | 174.4 |
| Peak expiratory flow rate decreased | 14 | 36 | 21.1 | 61.52 |
| Plethysmography | 3 | 87.9 | 26.7 | 289 |
| Polymerase chain reaction positive | 3 | 7.59 | 2.44 | 23.67 |
| Pulmonary function test abnormal | 16 | 9.29 | 5.68 | 15.21 |
| Pulmonary function test decreased | 29 | 6.37 | 4.42 | 9.18 |
| Respiratory rate decreased | 13 | 6.07 | 3.52 | 10.48 |
| Respiratory rate increased | 29 | 4.15 | 2.88 | 5.973 |
| SARS-CoV-2 test negative | 12 | 16.7 | 9.45 | 29.66 |
| SARS-CoV-2 test positive | 57 | 4.13 | 3.18 | 5.355 |
| Spirometry abnormal | 9 | 15.1 | 7.79 | 29.14 |
| Sputum abnormal | 5 | 9.67 | 4 | 23.36 |
| Sputum culture | 3 | 57.2 | 17.7 | 184.4 |
| Sputum culture positive | 4 | 13 | 4.85 | 34.95 |
| Total lung capacity abnormal | 5 | 22.9 | 9.42 | 55.72 |
| Total lung capacity decreased | 18 | 13.1 | 8.19 | 20.8 |
| Vital capacity decreased | 11 | 21.5 | 11.8 | 39.2 |
| Weight abnormal | 7 | 3.24 | 1.54 | 6.799 |
| Metabolism and nutrition disorders | Diabetes mellitus | 126 | 2.51 | 2.11 | 2.997 |
| Glucose tolerance impaired | 10 | 2.61 | 1.4 | 4.86 |
| Gout | 25 | 1.87 | 1.26 | 2.763 |
| Marasmus | 6 | 6.43 | 2.88 | 14.36 |
| Obesity | 27 | 2.27 | 1.55 | 3.311 |
| Starvation | 5 | 10.6 | 4.38 | 25.6 |
| Steroid diabetes | 6 | 4.82 | 2.16 | 10.76 |
| Type 2 diabetes mellitus | 49 | 2.47 | 1.87 | 3.273 |
| Musculoskeletal and connective tissue disorders | Arthralgia | 407 | 1.25 | 1.13 | 1.383 |
| Arthritis | 85 | 1.33 | 1.07 | 1.644 |
| Back pain | 464 | 2.64 | 2.41 | 2.901 |
| Bursitis | 14 | 1.76 | 1.04 | 2.969 |
| Crystal arthropathy | 4 | 25.6 | 9.47 | 69.33 |
| Fracture pain | 5 | 12.2 | 5.03 | 29.43 |
| Intervertebral disc compression | 3 | 3.68 | 1.18 | 11.43 |
| Intervertebral disc degeneration | 13 | 1.93 | 1.12 | 3.321 |
| Kyphosis | 7 | 6.09 | 2.9 | 12.82 |
| Limb discomfort | 45 | 1.51 | 1.12 | 2.02 |
| Mobility decreased | 92 | 1.55 | 1.27 | 1.908 |
| Muscle disorder | 12 | 2.26 | 1.28 | 3.984 |
| Muscle mass | 6 | 16 | 7.14 | 35.96 |
| Muscular weakness | 103 | 1.3 | 1.07 | 1.574 |
| Musculoskeletal chest pain | 23 | 1.88 | 1.25 | 2.836 |
| Myalgia | 211 | 1.83 | 1.59 | 2.092 |
| Neck pain | 59 | 1.38 | 1.07 | 1.781 |
| Oligoarthritis | 3 | 15 | 4.79 | 46.99 |
| Osteoarthritis | 50 | 1.49 | 1.13 | 1.962 |
| Osteoporosis | 61 | 1.47 | 1.14 | 1.885 |
| Pain in extremity | 339 | 1.46 | 1.31 | 1.63 |
| Polymyalgia rheumatica | 22 | 11.3 | 7.4 | 17.17 |
| Sjogren's syndrome | 10 | 2.41 | 1.29 | 4.479 |
| Soft tissue swelling | 3 | 4.23 | 1.36 | 13.14 |
| Spinal flattening | 5 | 39.1 | 15.9 | 95.79 |
| Spinal pain | 31 | 2.66 | 1.87 | 3.78 |
| Synovial cyst | 10 | 2.3 | 1.24 | 4.279 |
| Neoplasms benign, malignant and unspecified (incl cysts and polyps) | Acoustic neuroma | 4 | 13.6 | 5.05 | 36.41 |
| Adrenal neoplasm | 3 | 9.68 | 3.1 | 30.23 |
| Bladder neoplasm | 4 | 3.05 | 1.14 | 8.13 |
| Brain neoplasm | 13 | 1.9 | 1.1 | 3.277 |
| Breast cancer male | 5 | 12.2 | 5.03 | 29.43 |
| Colon cancer | 24 | 2.11 | 1.41 | 3.152 |
| Endometrial cancer | 5 | 3.79 | 1.57 | 9.124 |
| Glioblastoma | 5 | 4.96 | 2.06 | 11.96 |
| Leiomyoma | 11 | 20.9 | 11.5 | 38.01 |
| Lung neoplasm | 7 | 3.76 | 1.79 | 7.906 |
| Neoplasm malignant | 71 | 1.4 | 1.11 | 1.765 |
| Pancreatic neoplasm | 5 | 5.64 | 2.34 | 13.59 |
| Papillary serous endometrial carcinoma | 5 | 456 | 153 | 1360 |
| Papillary thyroid cancer | 4 | 3.28 | 1.23 | 8.748 |
| Rectal adenocarcinoma | 4 | 8.5 | 3.17 | 22.76 |
| Rectal cancer stage IV | 3 | 66.5 | 20.5 | 215.6 |
| Renal neoplasm | 5 | 2.75 | 1.14 | 6.617 |
| Uterine leiomyoma | 9 | 2 | 1.04 | 3.846 |
| Nervous system disorders | Anosmia | 35 | 4.93 | 3.54 | 6.881 |
| Bell's palsy | 8 | 9.66 | 4.81 | 19.41 |
| Brain stem haemorrhage | 3 | 4.56 | 1.47 | 14.2 |
| Cerebellar infarction | 3 | 3.19 | 1.03 | 9.902 |
| Cerebral thrombosis | 7 | 3.91 | 1.86 | 8.208 |
| Cerebral ventricle dilatation | 5 | 7.37 | 3.06 | 17.79 |
| Cerebrovascular accident | 118 | 1.29 | 1.08 | 1.551 |
| Dementia Alzheimer's type | 12 | 1.93 | 1.1 | 3.407 |
| Diabetic coma | 5 | 5.21 | 2.16 | 12.55 |
| Facial paralysis | 17 | 1.78 | 1.1 | 2.863 |
| Head discomfort | 36 | 2.36 | 1.7 | 3.281 |
| Headache | 839 | 1.83 | 1.71 | 1.967 |
| Hypersomnia | 32 | 1.53 | 1.08 | 2.162 |
| Hypotonia | 13 | 2.09 | 1.21 | 3.607 |
| Intracranial pressure increased | 8 | 2.25 | 1.13 | 4.512 |
| Lacunar infarction | 4 | 3.77 | 1.41 | 10.06 |
| Loss of consciousness | 107 | 1.33 | 1.1 | 1.608 |
| Mononeuropathy multiplex | 9 | 35.2 | 18 | 68.52 |
| Myasthenia gravis | 11 | 2.47 | 1.37 | 4.466 |
| Nerve compression | 21 | 2.76 | 1.8 | 4.241 |
| Pachymeningitis | 7 | 35.9 | 16.8 | 76.5 |
| Paraplegia | 5 | 2.42 | 1.01 | 5.82 |
| Peripheral nerve lesion | 3 | 10.2 | 3.28 | 32.01 |
| Post polio syndrome | 3 | 79.4 | 24.3 | 259.6 |
| Sciatica | 23 | 1.85 | 1.23 | 2.786 |
| Speech disorder | 55 | 1.51 | 1.16 | 1.969 |
| Syncope | 118 | 1.75 | 1.46 | 2.094 |
| Thalamus haemorrhage | 5 | 6.42 | 2.66 | 15.47 |
| Transient aphasia | 3 | 26.7 | 8.47 | 84.44 |
| Transient ischaemic attack | 35 | 1.93 | 1.39 | 2.695 |
| Trigeminal nerve disorder | 3 | 11.8 | 3.78 | 36.97 |
| Product issues | Product availability issue | 140 | 10.1 | 8.58 | 11.99 |
| Product complaint | 274 | 14.1 | 12.5 | 15.88 |
| Product supply issue | 11 | 1.86 | 1.03 | 3.362 |
| Psychiatric disorders | Discouragement | 11 | 4.49 | 2.48 | 8.121 |
| Excessive masturbation | 3 | 28.3 | 8.94 | 89.39 |
| Fear of death | 4 | 3.26 | 1.22 | 8.705 |
| Frustration tolerance decreased | 16 | 1.74 | 1.07 | 2.844 |
| Middle insomnia | 35 | 2.68 | 1.93 | 3.743 |
| Near death experience | 8 | 3 | 1.5 | 6.005 |
| Nervousness | 66 | 1.85 | 1.45 | 2.354 |
| Panic disorder | 8 | 2.94 | 1.47 | 5.894 |
| Poor quality sleep | 29 | 1.71 | 1.19 | 2.462 |
| Sleep disorder due to a general medical condition | 591 | 59.7 | 54.8 | 64.97 |
| Stress | 82 | 1.38 | 1.11 | 1.717 |
| Thought blocking | 6 | 18.4 | 8.17 | 41.24 |
| Renal and urinary disorders | Bladder cyst | 4 | 31.2 | 11.5 | 84.8 |
| Bladder mass | 3 | 8.23 | 2.64 | 25.66 |
| Bladder pain | 12 | 5.13 | 2.91 | 9.051 |
| Dysuria | 38 | 1.45 | 1.05 | 1.994 |
| Nephrolithiasis | 68 | 1.86 | 1.47 | 2.363 |
| Renal artery stenosis | 3 | 3.2 | 1.03 | 9.941 |
| Renal colic | 9 | 5.48 | 2.85 | 10.57 |
| Renal pain | 17 | 2.1 | 1.3 | 3.378 |
| Urinary tract pain | 5 | 12.6 | 5.2 | 30.43 |
| Reproductive system and breast disorders | Bladder prolapse | 5 | 4.42 | 1.83 | 10.64 |
| Breast calcifications | 3 | 6.27 | 2.01 | 19.54 |
| Breast disorder | 4 | 2.82 | 1.05 | 7.515 |
| Ovarian disorder | 3 | 5.05 | 1.62 | 15.72 |
| Prostatitis | 8 | 3.72 | 1.86 | 7.455 |
| Respiratory, thoracic and mediastinal disorders | Allergic cough | 3 | 3.84 | 1.24 | 11.95 |
| Allergic respiratory disease | 7 | 68.3 | 31.6 | 147.8 |
| Allergic sinusitis | 6 | 8.65 | 3.87 | 19.33 |
| Aphonia | 43 | 3.99 | 2.95 | 5.385 |
| Apnoea | 27 | 5.97 | 4.09 | 8.725 |
| Apparent life threatening event | 3 | 14 | 4.46 | 43.76 |
| Asphyxia | 12 | 1.92 | 1.09 | 3.386 |
| Aspiration | 17 | 2.7 | 1.68 | 4.353 |
| Aspirin-exacerbated respiratory disease | 3 | 3.54 | 1.14 | 11.02 |
| Asthma | 2804 | 41.4 | 39.7 | 43.16 |
| Asthma exercise induced | 7 | 23 | 10.8 | 48.68 |
| Asthma-chronic obstructive pulmonary disease overlap syndrome | 9 | 17.3 | 8.93 | 33.46 |
| Asthmatic crisis | 714 | 239 | 219 | 259.9 |
| Bronchial disorder | 9 | 6.37 | 3.31 | 12.29 |
| Bronchial hyperreactivity | 10 | 10.1 | 5.43 | 18.9 |
| Bronchial obstruction | 41 | 36.2 | 26.4 | 49.47 |
| Bronchial secretion retention | 15 | 12.7 | 7.63 | 21.16 |
| Bronchial wall thickening | 15 | 17.9 | 10.8 | 29.94 |
| Bronchiectasis | 59 | 10.3 | 7.98 | 13.36 |
| Bronchitis chronic | 8 | 3.98 | 1.99 | 7.981 |
| Bronchomalacia | 4 | 22.8 | 8.43 | 61.53 |
| Bronchopulmonary dysplasia | 3 | 7.01 | 2.25 | 21.84 |
| Bronchospasm | 101 | 11.3 | 9.3 | 13.8 |
| Catarrh | 17 | 20.7 | 12.8 | 33.46 |
| Choking | 27 | 1.9 | 1.3 | 2.777 |
| Choking sensation | 28 | 7.32 | 5.04 | 10.62 |
| Chronic eosinophilic rhinosinusitis | 5 | 171 | 65.2 | 447.8 |
| Chronic obstructive pulmonary disease | 212 | 5.84 | 5.1 | 6.692 |
| Cough | 1348 | 6.56 | 6.2 | 6.941 |
| Diaphragmatic disorder | 3 | 5.57 | 1.79 | 17.32 |
| Dysphonia | 150 | 3.4 | 2.89 | 3.993 |
| Dyspnoea | 2879 | 8.74 | 8.38 | 9.104 |
| Dyspnoea exertional | 246 | 7.48 | 6.59 | 8.491 |
| Emphysema | 37 | 5.5 | 3.98 | 7.606 |
| Eosinophilic pneumonia | 6 | 3.14 | 1.41 | 7.01 |
| Eosinophilic pneumonia chronic | 3 | 10.4 | 3.32 | 32.42 |
| Haemoptysis | 45 | 2.11 | 1.58 | 2.833 |
| Hypopnoea | 8 | 3.18 | 1.59 | 6.363 |
| Hypoventilation | 20 | 7.9 | 5.09 | 12.28 |
| Hypoxia | 45 | 1.88 | 1.4 | 2.522 |
| Increased bronchial secretion | 48 | 25 | 18.8 | 33.36 |
| Increased upper airway secretion | 21 | 10.1 | 6.58 | 15.56 |
| Increased viscosity of bronchial secretion | 17 | 34.9 | 21.5 | 56.69 |
| Increased viscosity of upper respiratory secretion | 8 | 11 | 5.45 | 22.01 |
| Irregular breathing | 5 | 8.4 | 3.48 | 20.28 |
| Laryngeal oedema | 9 | 2.58 | 1.34 | 4.966 |
| Lower respiratory tract congestion | 15 | 5.89 | 3.54 | 9.784 |
| Lung diffusion disorder | 3 | 18.9 | 6.02 | 59.44 |
| Lung disorder | 193 | 5.29 | 4.59 | 6.098 |
| Lung hyperinflation | 14 | 16.4 | 9.67 | 27.86 |
| Lung infiltration | 24 | 5.8 | 3.88 | 8.666 |
| Lung opacity | 17 | 9.28 | 5.75 | 14.97 |
| Mouth breathing | 3 | 11.4 | 3.64 | 35.59 |
| Nasal congestion | 247 | 5.3 | 4.68 | 6.019 |
| Nasal crusting | 7 | 10.4 | 4.94 | 21.96 |
| Nasal discharge discolouration | 5 | 2.97 | 1.23 | 7.15 |
| Nasal disorder | 9 | 3.84 | 2 | 7.402 |
| Nasal dryness | 9 | 1.93 | 1 | 3.715 |
| Nasal inflammation | 6 | 6.69 | 2.99 | 14.93 |
| Nasal mucosal discolouration | 3 | 25.4 | 8.04 | 80.02 |
| Nasal obstruction | 9 | 6.69 | 3.47 | 12.89 |
| Nasal oedema | 9 | 8.5 | 4.41 | 16.4 |
| Nasal polyps | 62 | 21.3 | 16.5 | 27.37 |
| Nasal septum deviation | 7 | 5.12 | 2.43 | 10.76 |
| Nocturnal dyspnoea | 10 | 9.87 | 5.29 | 18.42 |
| Obstructive airways disorder | 178 | 14.6 | 12.6 | 16.91 |
| Obstructive sleep apnoea syndrome | 6 | 15.2 | 6.77 | 34.06 |
| Oropharyngeal discomfort | 43 | 6.2 | 4.59 | 8.37 |
| Oropharyngeal pain | 182 | 2.38 | 2.06 | 2.756 |
| Orthopnoea | 6 | 2.65 | 1.19 | 5.912 |
| Painful respiration | 14 | 7.65 | 4.52 | 12.95 |
| Pharyngeal erythema | 7 | 4.67 | 2.22 | 9.813 |
| Pharyngeal swelling | 20 | 2.61 | 1.68 | 4.048 |
| Pharyngeal ulceration | 4 | 3.81 | 1.43 | 10.17 |
| Pleural thickening | 4 | 4.77 | 1.78 | 12.74 |
| Pleurisy | 10 | 2.45 | 1.32 | 4.562 |
| Pleuritic pain | 7 | 4.41 | 2.1 | 9.269 |
| Pneumonitis | 48 | 2.33 | 1.76 | 3.101 |
| Pneumothorax | 47 | 4.02 | 3.02 | 5.354 |
| Productive cough | 467 | 10.9 | 9.93 | 11.96 |
| Prolonged expiration | 10 | 36.1 | 19.2 | 68.1 |
| Pulmonary congestion | 96 | 10.4 | 8.49 | 12.71 |
| Pulmonary embolism | 88 | 1.64 | 1.33 | 2.028 |
| Pulmonary fibrosis | 25 | 2.01 | 1.36 | 2.974 |
| Pulmonary mass | 55 | 4.25 | 3.26 | 5.539 |
| Pulmonary oedema | 72 | 2.41 | 1.91 | 3.042 |
| Pulmonary pain | 20 | 6.64 | 4.28 | 10.32 |
| Pulmonary thrombosis | 27 | 3.17 | 2.17 | 4.628 |
| Rales | 34 | 6.76 | 4.82 | 9.48 |
| Respiration abnormal | 56 | 9.84 | 7.56 | 12.81 |
| Respiratory depth decreased | 3 | 76.9 | 23.5 | 251.1 |
| Respiratory disorder | 128 | 6.01 | 5.05 | 7.162 |
| Respiratory distress | 44 | 2.54 | 1.89 | 3.416 |
| Respiratory failure | 63 | 1.35 | 1.06 | 1.732 |
| Respiratory fatigue | 3 | 13.4 | 4.29 | 42.07 |
| Respiratory gas exchange disorder | 6 | 16.1 | 7.17 | 36.08 |
| Respiratory symptom | 49 | 19.9 | 15 | 26.45 |
| Respiratory tract congestion | 50 | 4.26 | 3.23 | 5.632 |
| Respiratory tract inflammation | 4 | 8.84 | 3.3 | 23.68 |
| Respiratory tract irritation | 5 | 7.23 | 3 | 17.44 |
| Restrictive pulmonary disease | 10 | 10 | 5.38 | 18.74 |
| Reversible airways obstruction | 13 | 18 | 10.4 | 31.28 |
| Rhinitis allergic | 20 | 6.02 | 3.87 | 9.342 |
| Rhinorrhoea | 163 | 2.94 | 2.52 | 3.433 |
| Rhonchi | 6 | 5.15 | 2.31 | 11.49 |
| Sinus congestion | 35 | 3.45 | 2.48 | 4.814 |
| Sinus disorder | 65 | 4.03 | 3.15 | 5.142 |
| Sinus pain | 6 | 2.27 | 1.02 | 5.048 |
| Sinus polyp | 4 | 8.7 | 3.25 | 23.31 |
| Sleep apnoea syndrome | 43 | 2.45 | 1.82 | 3.309 |
| Small airways disease | 7 | 87 | 39.9 | 189.6 |
| Sneezing | 78 | 4.75 | 3.8 | 5.944 |
| Snoring | 14 | 4.63 | 2.74 | 7.828 |
| Sputum discoloured | 214 | 20.2 | 17.6 | 23.14 |
| Sputum increased | 22 | 11.3 | 7.39 | 17.16 |
| Sputum retention | 10 | 12.8 | 6.83 | 23.83 |
| Status asthmaticus | 7 | 25.5 | 12 | 54.15 |
| Stridor | 12 | 7 | 3.96 | 12.35 |
| Suffocation feeling | 14 | 8.25 | 4.87 | 13.96 |
| Tachypnoea | 27 | 3.06 | 2.1 | 4.466 |
| Throat clearing | 28 | 7.88 | 5.43 | 11.43 |
| Throat irritation | 65 | 2.1 | 1.65 | 2.684 |
| Throat tightness | 38 | 2.25 | 1.64 | 3.098 |
| Tracheal disorder | 3 | 7.86 | 2.52 | 24.5 |
| Tracheal stenosis | 5 | 15.4 | 6.34 | 37.2 |
| Upper respiratory tract congestion | 8 | 3.89 | 1.94 | 7.801 |
| Upper respiratory tract inflammation | 4 | 2.93 | 1.1 | 7.817 |
| Upper-airway cough syndrome | 37 | 5.22 | 3.78 | 7.216 |
| Use of accessory respiratory muscles | 8 | 31.5 | 15.6 | 63.94 |
| Vocal cord disorder | 6 | 4.62 | 2.07 | 10.31 |
| Vocal cord dysfunction | 6 | 8.93 | 3.99 | 19.97 |
| Wheezing | 1445 | 34 | 32.2 | 35.92 |
| Skin and subcutaneous tissue disorders | Cellulite | 3 | 15.5 | 4.94 | 48.49 |
| Dermal cyst | 6 | 3.14 | 1.41 | 6.992 |
| Eczema | 79 | 3.13 | 2.51 | 3.903 |
| Hand dermatitis | 3 | 8.54 | 2.74 | 26.64 |
| Nail bed disorder | 3 | 8.15 | 2.61 | 25.4 |
| Pemphigoid | 16 | 2.8 | 1.72 | 4.581 |
| Pruritus | 318 | 1.29 | 1.15 | 1.437 |
| Pruritus generalised | 34 | 2.44 | 1.74 | 3.414 |
| Purpura | 12 | 2.34 | 1.33 | 4.133 |
| Pustular psoriasis | 5 | 2.46 | 1.02 | 5.918 |
| Rash erythematous | 39 | 1.43 | 1.05 | 1.965 |
| Rash pruritic | 53 | 1.52 | 1.16 | 1.993 |
| Skin atrophy | 19 | 4.21 | 2.68 | 6.613 |
| Skin discharge | 4 | 16.5 | 6.12 | 44.36 |
| Skin disorder | 41 | 1.61 | 1.18 | 2.185 |
| Skin fragility | 10 | 3.9 | 2.1 | 7.268 |
| Skin lesion | 30 | 1.44 | 1.01 | 2.06 |
| Urticaria | 167 | 1.52 | 1.31 | 1.774 |
| Social circumstances | Bedridden | 36 | 3.86 | 2.78 | 5.36 |
| Cardiac assistance device user | 3 | 13 | 4.16 | 40.72 |
| Dependence on oxygen therapy | 9 | 21.6 | 11.2 | 41.98 |
| Loss of personal independence in daily activities | 928 | 19.2 | 17.9 | 20.52 |
| Social problem | 164 | 61.1 | 52.1 | 71.7 |
| Walking aid user | 14 | 3.02 | 1.79 | 5.113 |
| Walking disability | 5 | 2.9 | 1.2 | 6.968 |
| Wheelchair user | 8 | 2.26 | 1.13 | 4.518 |
| Surgical and medical procedures | Abdominal cavity drainage | 3 | 6.85 | 2.2 | 21.35 |
| Abscess drainage | 3 | 6.07 | 1.95 | 18.91 |
| Appendicectomy | 7 | 3.38 | 1.61 | 7.1 |
| Arterial angioplasty | 3 | 117 | 34.9 | 392.8 |
| Biliary tract operation | 3 | 102 | 30.9 | 340.4 |
| Bladder catheterisation | 3 | 4.51 | 1.45 | 14.01 |
| Bladder operation | 3 | 3.68 | 1.18 | 11.43 |
| Breast operation | 4 | 10.1 | 3.78 | 27.14 |
| Bronchoplasty | 5 | 205 | 76.9 | 546.3 |
| Cancer surgery | 3 | 3.52 | 1.13 | 10.95 |
| Cardiac ablation | 4 | 2.91 | 1.09 | 7.762 |
| Cardiac operation | 23 | 4.31 | 2.86 | 6.488 |
| Cardiac pacemaker insertion | 24 | 6.56 | 4.39 | 9.812 |
| Cataract operation | 27 | 7.38 | 5.05 | 10.78 |
| Central venous catheterisation | 7 | 2.81 | 1.34 | 5.908 |
| Chemotherapy | 6 | 2.35 | 1.05 | 5.234 |
| Corneal transplant | 5 | 11.1 | 4.57 | 26.71 |
| Coronary arterial stent insertion | 8 | 4.44 | 2.22 | 8.901 |
| Coronary artery bypass | 5 | 2.52 | 1.05 | 6.063 |
| Drug implantation | 3 | 492 | 118 | 2059 |
| Ear operation | 3 | 14.1 | 4.51 | 44.27 |
| Emergency care | 15 | 6.6 | 3.97 | 10.97 |
| Endotracheal intubation | 16 | 9.27 | 5.66 | 15.18 |
| Enterostomy | 4 | 14.5 | 5.4 | 39.01 |
| Eye operation | 10 | 3.4 | 1.83 | 6.324 |
| Facetectomy | 3 | 410 | 103 | 1639 |
| Finger amputation | 3 | 5.63 | 1.81 | 17.52 |
| Gastrointestinal surgery | 3 | 5.2 | 1.67 | 16.18 |
| Glaucoma surgery | 4 | 23.1 | 8.55 | 62.4 |
| High frequency ablation | 4 | 12 | 4.46 | 32.13 |
| Hip arthroplasty | 21 | 1.88 | 1.23 | 2.893 |
| Hip surgery | 19 | 5.21 | 3.32 | 8.177 |
| Hospitalisation | 677 | 5.94 | 5.49 | 6.415 |
| Ileostomy | 6 | 3.67 | 1.65 | 8.189 |
| Implantable defibrillator insertion | 5 | 7.61 | 3.15 | 18.35 |
| Intestinal operation | 14 | 14.9 | 8.78 | 25.28 |
| Intraocular lens implant | 3 | 8.72 | 2.8 | 27.21 |
| Joint fluid drainage | 4 | 17 | 6.31 | 45.75 |
| Joint stabilisation | 3 | 98.4 | 29.7 | 325.9 |
| Knee arthroplasty | 24 | 1.62 | 1.09 | 2.425 |
| Knee operation | 25 | 3.89 | 2.63 | 5.768 |
| Limb operation | 10 | 2.86 | 1.54 | 5.331 |
| Lung lobectomy | 3 | 12.8 | 4.1 | 40.08 |
| Lung operation | 3 | 5.39 | 1.73 | 16.79 |
| Medical induction of coma | 3 | 8.94 | 2.87 | 27.91 |
| Myomectomy | 5 | 47.7 | 19.3 | 117.5 |
| Nasal polypectomy | 7 | 76.6 | 35.3 | 166.1 |
| Nasal septal operation | 5 | 21.7 | 8.92 | 52.74 |
| Neck surgery | 9 | 4.92 | 2.55 | 9.473 |
| Nephrectomy | 6 | 5.27 | 2.36 | 11.76 |
| Oxygen therapy | 10 | 6.49 | 3.48 | 12.09 |
| Palliative care | 12 | 12 | 6.81 | 21.29 |
| Paracentesis | 3 | 5.18 | 1.66 | 16.12 |
| Patient isolation | 25 | 95.9 | 63.4 | 145.2 |
| Polypectomy | 9 | 17.2 | 8.87 | 33.23 |
| Prostatectomy | 3 | 8.94 | 2.87 | 27.91 |
| Quarantine | 39 | 140 | 99.7 | 196.7 |
| Renal artery angioplasty | 3 | 145 | 42.4 | 493.8 |
| Renal artery stent placement | 3 | 30 | 9.48 | 94.95 |
| Renal stone removal | 6 | 14.4 | 6.44 | 32.35 |
| Renal surgery | 4 | 9.34 | 3.49 | 25.04 |
| Retinopexy | 3 | 63.1 | 19.5 | 204.1 |
| Self-medication | 8 | 4.54 | 2.27 | 9.099 |
| Shoulder operation | 7 | 2.46 | 1.17 | 5.157 |
| Sinus operation | 45 | 26.7 | 19.8 | 35.95 |
| Spinal anaesthesia | 4 | 82 | 29.3 | 229.2 |
| Spinal decompression | 3 | 11.3 | 3.61 | 35.26 |
| Stent placement | 17 | 3.47 | 2.16 | 5.593 |
| Stoma closure | 4 | 20.4 | 7.55 | 54.95 |
| Surgery | 65 | 1.75 | 1.37 | 2.231 |
| Suture insertion | 4 | 10.3 | 3.85 | 27.66 |
| Therapy cessation | 72 | 1.62 | 1.28 | 2.042 |
| Therapy interrupted | 149 | 4.42 | 3.76 | 5.191 |
| Toe operation | 3 | 5.65 | 1.82 | 17.6 |
| Tonsillectomy | 6 | 6.53 | 2.93 | 14.59 |
| Tooth extraction | 21 | 2.64 | 1.72 | 4.049 |
| Tracheostomy | 3 | 3.22 | 1.04 | 10.02 |
| Treatment delayed | 3 | 4.92 | 1.58 | 15.31 |
| Uterine dilation and curettage | 4 | 9.09 | 3.39 | 24.34 |
| Vascular graft | 5 | 4.15 | 1.72 | 9.984 |
| Vascular disorders | Aortic disorder | 3 | 6.34 | 2.04 | 19.75 |
| Aortic stenosis | 8 | 3.98 | 1.99 | 7.971 |
| Arterial occlusive disease | 11 | 2.31 | 1.28 | 4.17 |
| Arteriosclerosis | 10 | 2.04 | 1.1 | 3.794 |
| Arteriovenous fistula | 3 | 8.06 | 2.59 | 25.15 |
| Hyperaemia | 8 | 6.45 | 3.22 | 12.94 |
| Hypertension | 178 | 1.18 | 1.02 | 1.369 |
| Infarction | 10 | 2.08 | 1.12 | 3.865 |
| Jugular vein distension | 3 | 7.69 | 2.47 | 23.96 |
| Thrombosis | 78 | 1.4 | 1.12 | 1.745 |
| Varicose vein | 13 | 3.39 | 1.96 | 5.839 |
| Vascular pain | 6 | 7.24 | 3.24 | 16.17 |
| Vasculitis | 31 | 4.41 | 3.1 | 6.286 |
